# Supplementary material for: Unique Lipid Signatures of Extracellular Vesicles from the Airways of Asthmatics
Source: PubMed Central journal article supplement (PMC6037776; doi:10.1038/s41598-018-28655-9), 2018-07-09
Supplement: 41598_2018_28655_MOESM1_ESM.pdf [file 41598_2018_28655_MOESM1_ESM.pdf]

## Unique Lipid Signatures of Extracellular Vesicles from the Airways of Asthmatics

Hough, K.P., BS<sup>1</sup>, L. Wilson, BS<sup>4,5</sup>, J.L. Trevor, MD<sup>1</sup>, J.G. Strenkowski, BS<sup>1</sup>, N. Maina, MD, PhD<sup>1</sup>, Y. Kim, PhD<sup>1</sup>, M.L. Spell, BS<sup>2</sup>, Y. Wang, PhD<sup>1</sup>, D. Chanda, PhD<sup>1</sup>, J. Rodriguez Dager BS<sup>1</sup>, N. Sharma, MD<sup>1</sup>, C. Miranda, MD, PhD<sup>1</sup>, V.B. Antony, MD<sup>1</sup>, M.T. Dransfield, MD<sup>1</sup>, D.D. Chaplin, MD, PhD<sup>3</sup>, C. Steele, PhD<sup>1</sup>, S. Barnes, PhD<sup>4,5</sup>, S.R. Duncan, MD<sup>1</sup>, J.K. Prasain, PhD<sup>4,5</sup>, V.J. Thannickal, MD<sup>1</sup>, and J.S. Deshane, PhD<sup>1\*</sup>

<sup>1</sup>Department of Medicine, Division of Pulmonary, Allergy and Critical Care Medicine, <sup>2</sup>Center for Aids Research, <sup>3</sup>Department of Microbiology, <sup>4</sup>Department of Pharmacology and Toxicology, and <sup>5</sup>Targeted Metabolomics and Proteomics Laboratory, University of Alabama at Birmingham, Birmingham, AL

# Supplementary Figure 1

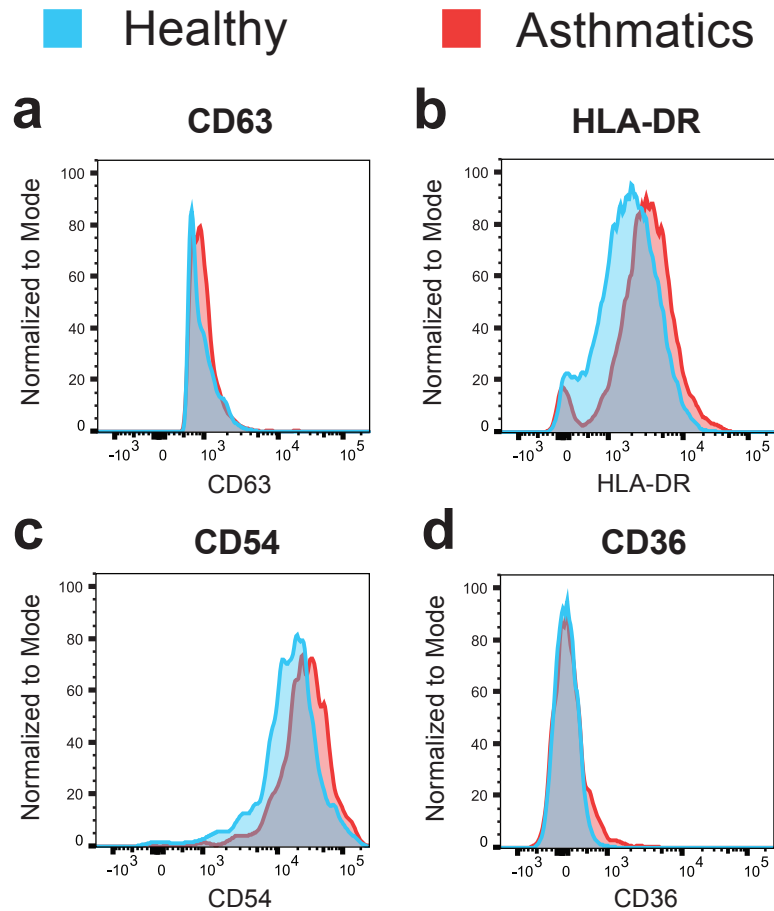

**Supplementary Figure 1** – Representative histograms of airway exosomes stained with antibodies for surface markers: CD63, HLA-DR, CD54, and CD36. (a) CD63, a tetraspanin used as an exosome marker. (b) HLA-DR, a class II antigen presentation molecule. (c) CD54, also known as ICAM-1, a surface integrin molecule. (d) CD36, a pattern-recognition scavenger protein (Healthy subjects n=9; Asthmatic subjects n=9).

# Supplementary Figure 2

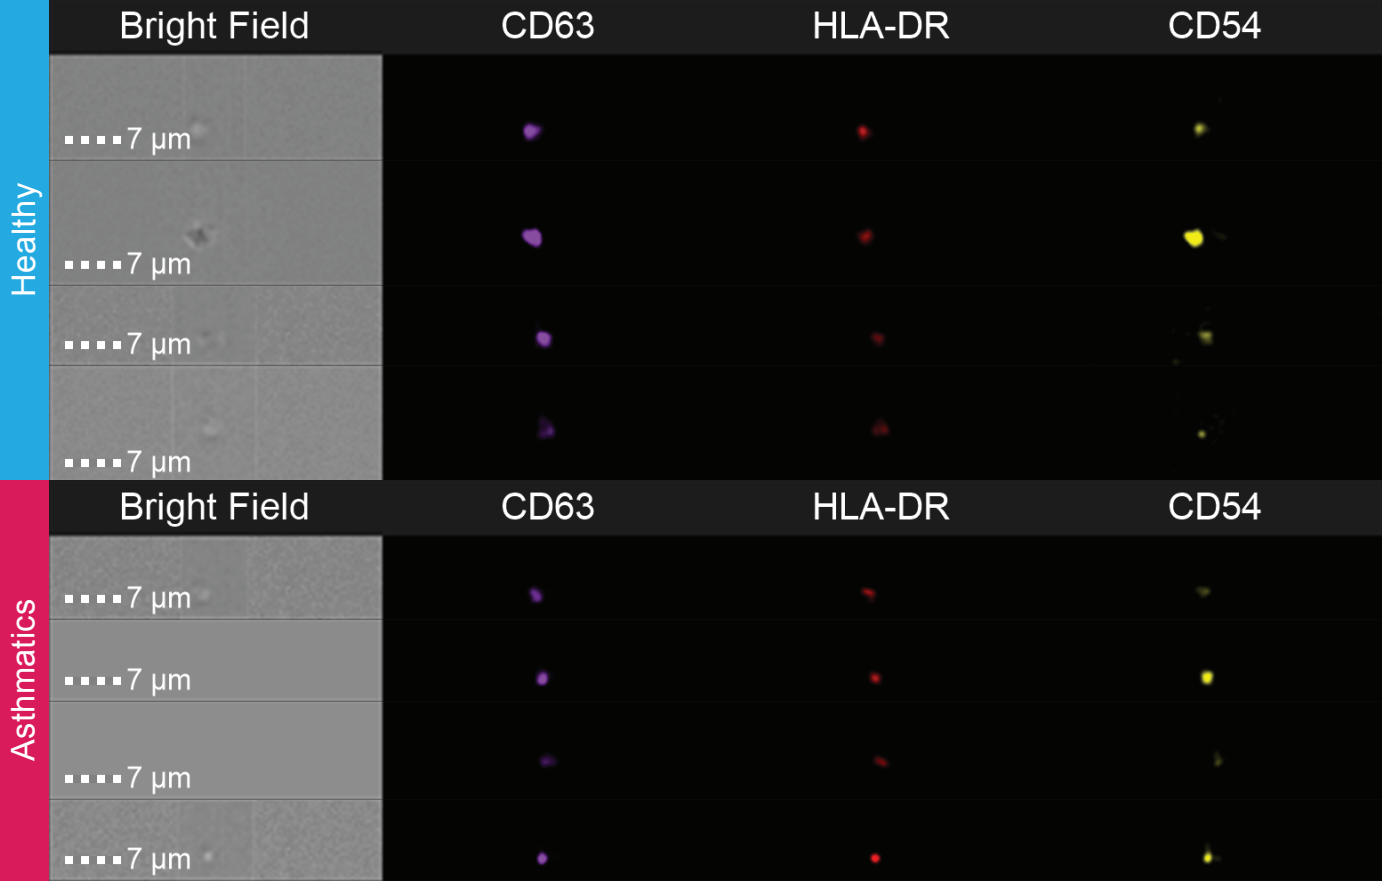

**Supplementary Figure 2** – ImageStream analysis of airway exosomes from healthy and asthmatic subjects. (a) Representative fluorescence images from ImageStream of airway exosomes from four healthy and asthmatic subjects. Exosomes were stained with antibodies for surface markers: CD63, HLA-DR, and CD54 (Healthy subjects n=6; Asthmatic subjects n=6).

### Supplementary Figure 3

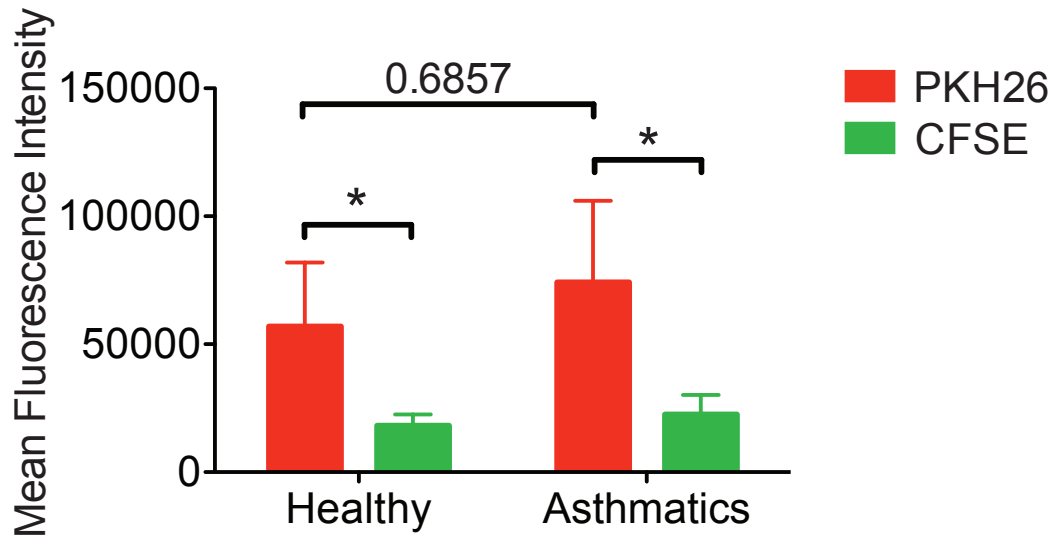

**Supplementary Figure 3** – Airway exosomes have higher lipid content than protein, as assessed by PKH26, a lipophilic dye, and CFSE for protein using ImageStream. Differences in protein and lipid content was not seen between study groups (Mann Whitney T test,  $* < 0.05$ ; Healthy subjects  $n = 4$ ; Asthmatic subjects  $n = 4$ ).

## Supplementary Figure 4

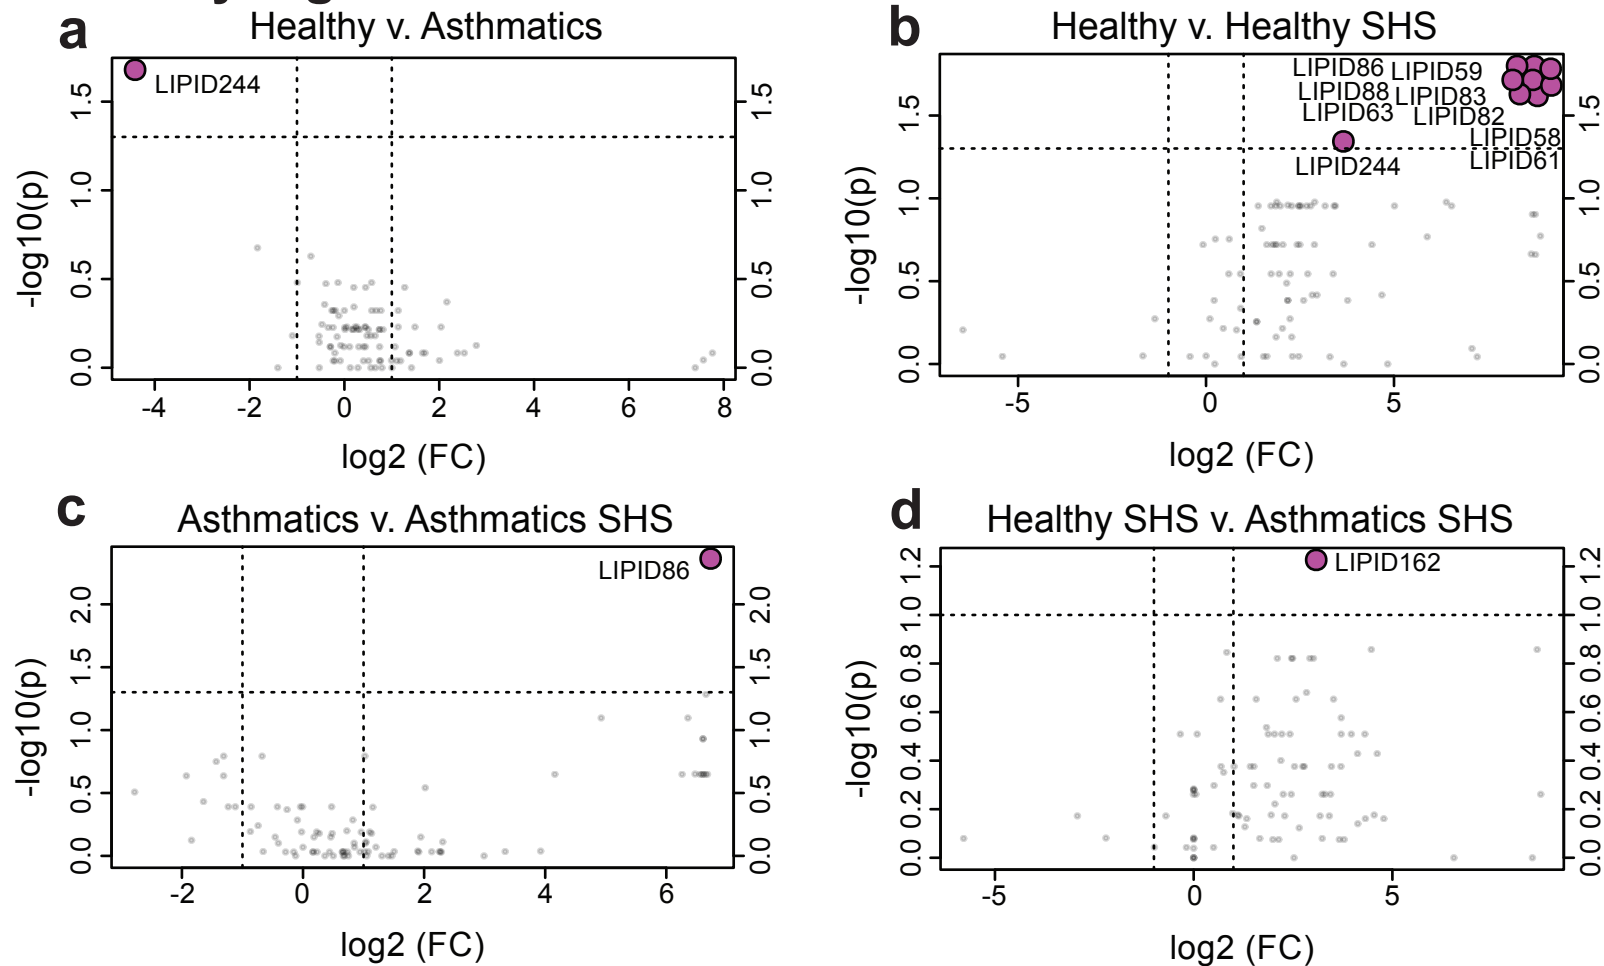

**Supplementary Figure 4** – Volcano plot of the bivariate analysis (performed on Metaboanalyst 3.0) of identified lipids from BAL exosomes. Y-axis displays significance, represented as  $-\log(p\text{-value})$ , and the x-axis displays log base-2 fold-change. The horizontal dotted line demarks the 0.05 p-value cutoff. Significant data points were enlarged and colored purple for illustration purposes. (a) Healthy subjects versus asthmatics, non-SHS exposed. LIPID244 (phosphatidylglycerol 34:2,  $p=0.023$ ) was found to be more abundant in healthy subjects. (b) Healthy subjects versus SHS exposed healthy subjects. Identified lipids were all higher in healthy subjects. LIPID 58 (monosialoganglioside 28:3, 264.2 m/z,  $p=0.024$ ), LIPID59 (monosialoganglioside 28:3, 282.2 m/z,  $p=0.024$ ), LIPID61 (ceramide-phosphate 28:1, 264.2 m/z,  $p=0.024$ ), LIPID63 (ceramide-phosphate 28:1, 282.2 m/z,  $p=0.024$ ), LIPID82 (mannosyl-diinositol phosphoryl-ceramide 26:2, 264.2 m/z,  $p=0.024$ ), LIPID83 (mannosyl-diinositol phosphoryl-ceramide 26:2, 282.2 m/z,  $p=0.024$ ), LIPID86 (ceramide 34:2,  $p=0.023$ ), LIPID88 (ceramide-phosphate 28:0,  $p=0.024$ ), and LIPID244 (phosphatidylglycerol 34:2,  $p=0.040$ ). (c) Asthmatics versus SHS exposed asthmatics. LIPID86 (ceramide 34:2,  $p=0.012$ ) was significantly higher in asthmatics. (d) Healthy subjects exposed to SHS versus asthmatics exposed to SHS. LIPID162 (sphingomyelin 34:1,  $p=0.046$ ) was significantly higher in asthmatics exposed to SHS (Healthy subjects  $n = 9$  (no SHS  $n=4$ , +SHS  $n = 5$ ); Asthmatic subjects  $n = 11$  (no SHS  $n=6$ , +SHS  $n = 5$ )).

# Supplementary Figure 5

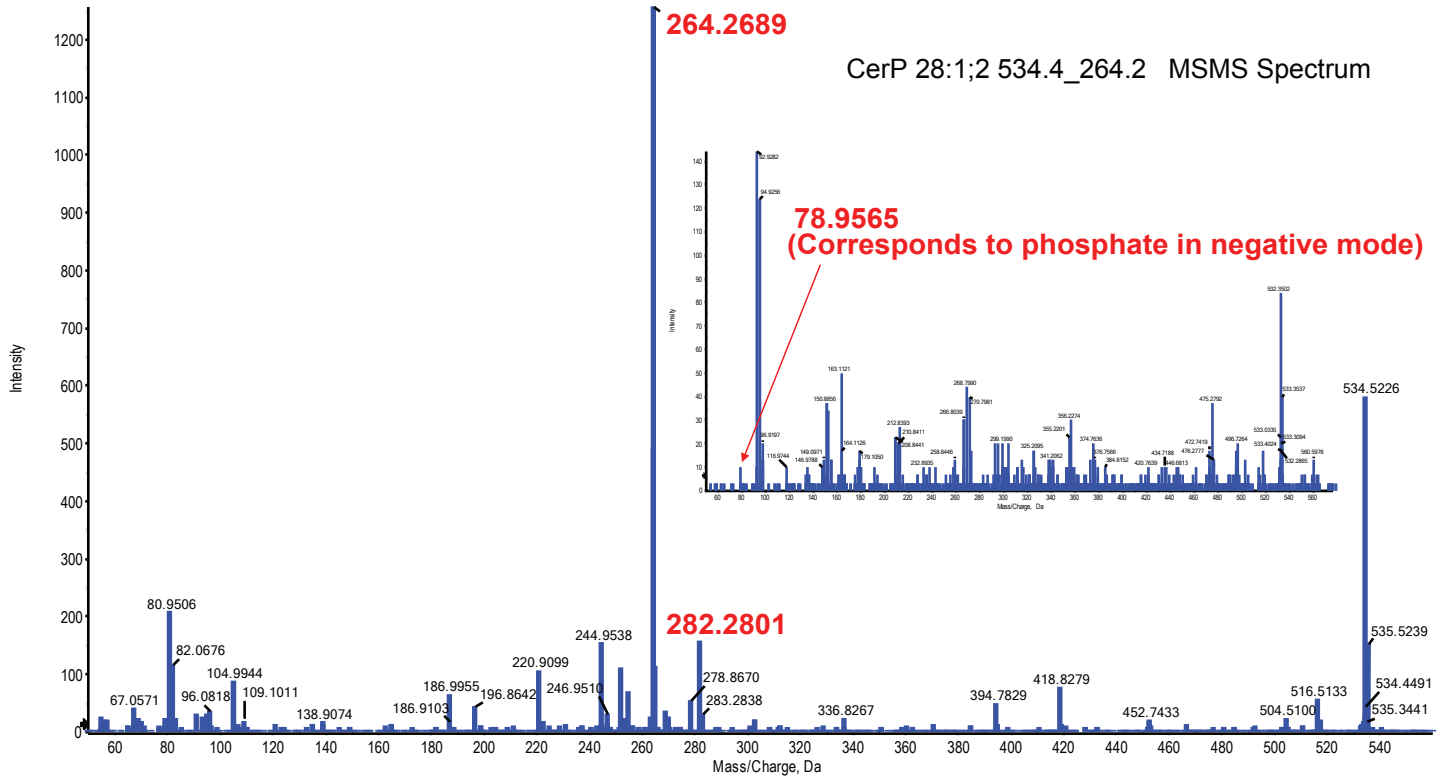

**Supplementary Figure 5** – Mass spectrum of ceramide-phosphate 28:1 from BAL exosomes. Ceramide-phosphate 28:1 was detected from the SWATH lipidomics reported in Table 2. The presence of this modified lipid species was confirmed by targeted lipidomics. The red arrow pointing to the mass/charge ratio of 78.9565 m/z corresponds to the phosphate of ceramide-phosphate 28:1.

## Supplementary Figure 6

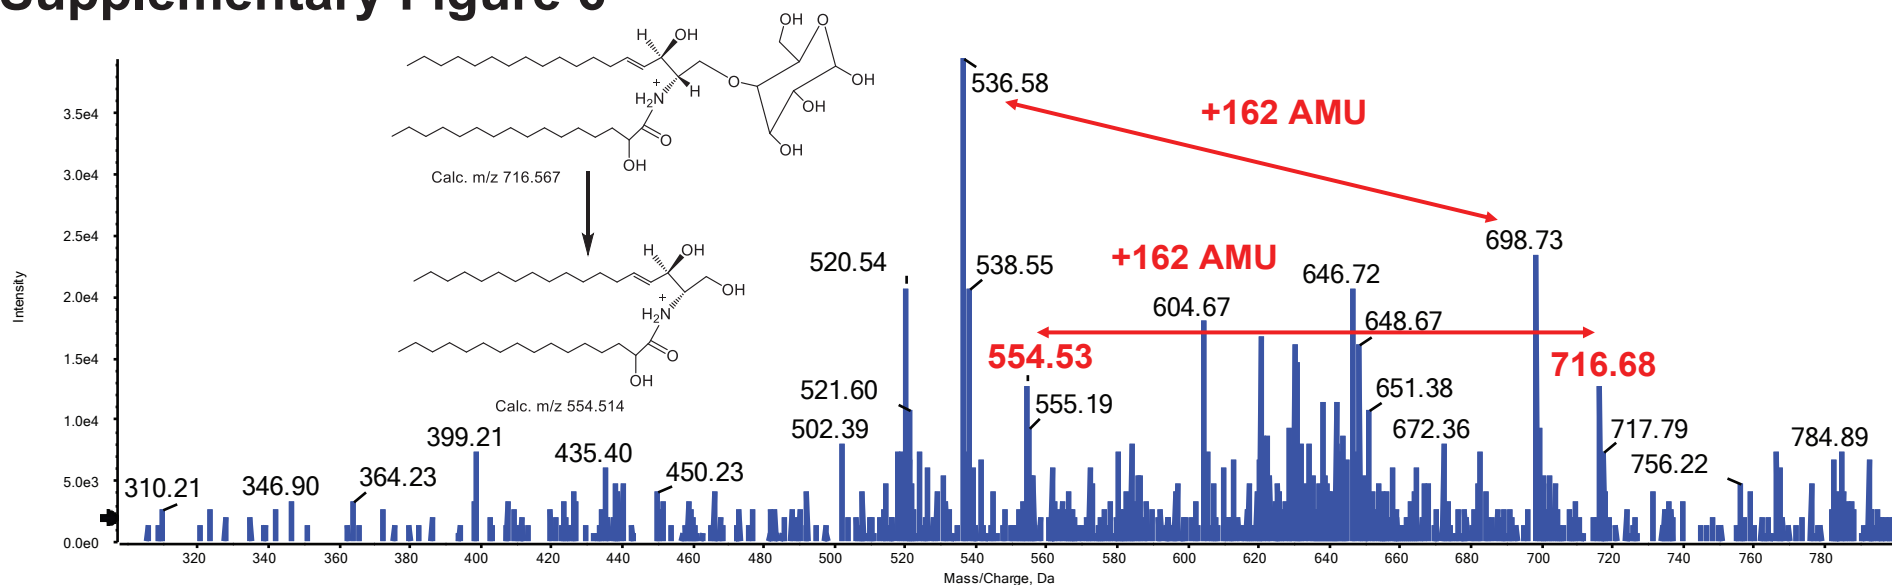

**Supplementary Figure 6** – Mass spectrum of trihexosylceramide 40:1. Trihexosylceramide 40:1 was detected from the SWATH lipidomics reported in Supplementary Table 2. The presence of this lipid species was confirmed by targeted lipidomics. The proposed structure for trihexosylceramide 40:1 is also represented in the mass spectrum on the left-side. The red arrows indicate the mass difference for the hexose.

# Supplementary Figure 7

**a** Healthy v. Asthmatics

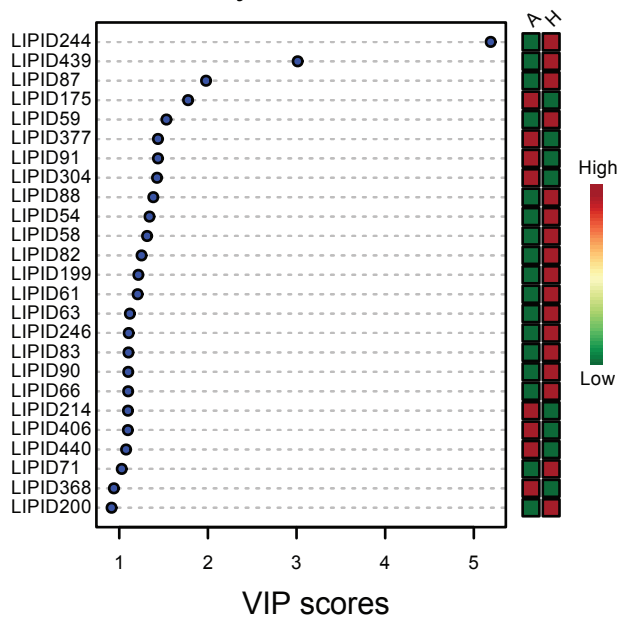

**b** Healthy v. Healthy SHS

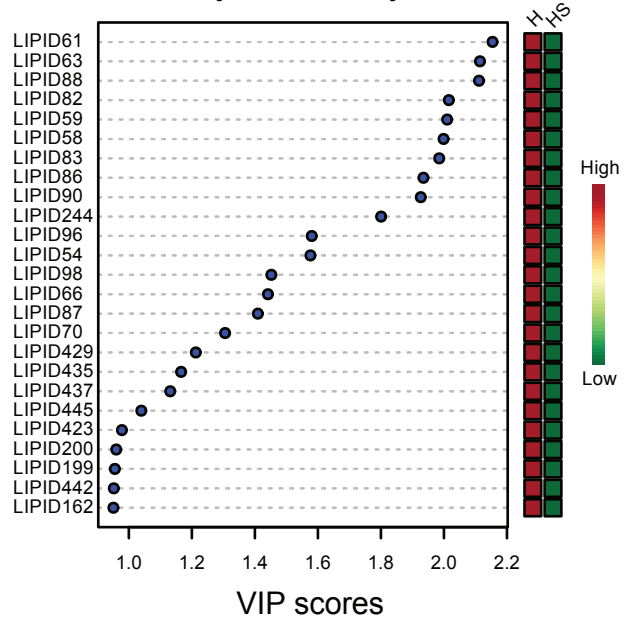

**c** Asthmatics v. Asthmatics SHS

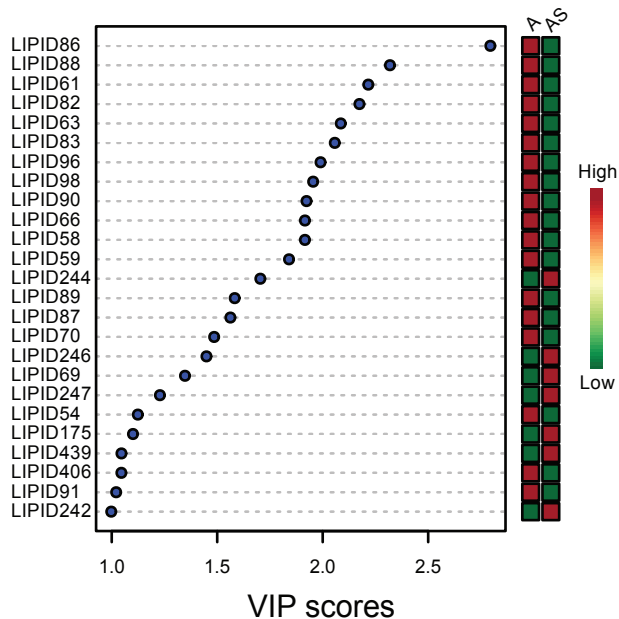

**d** Healthy SHS v. Asthmatics SHS

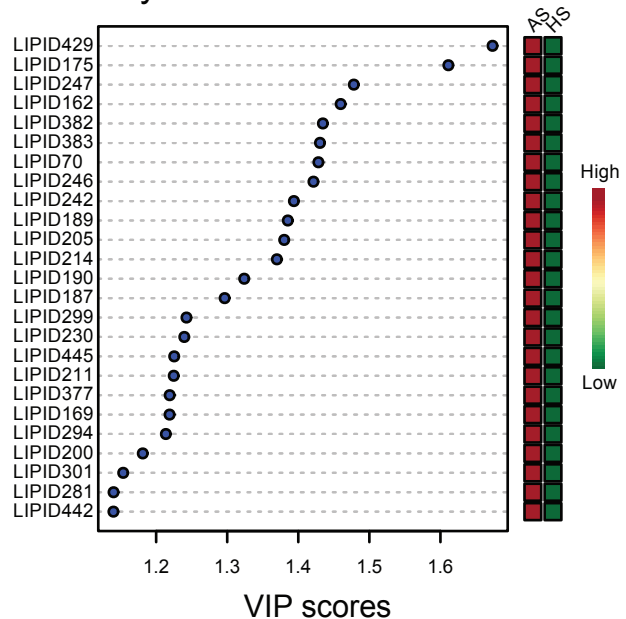

**Supplementary Figure 7** – Variable Importance in Projection (VIP) scores from the partial least squares (PLS) analysis (performed on Metaboanalyst 3.0) of identified lipids from BAL exosomes. Higher VIP scores indicate important players in the PLS model. (a) Healthy subjects versus asthmatics, non-SHS exposed. The significant lipid, LIPID244, is phosphatidylglycerol 34:2. (b) Healthy subjects versus SHS exposed healthy subjects. The important lipids, LIPID61, LIPID62 and LIPID88, are ceramide-phosphate 28:1 (264.2 m/z), ceramide-phosphate 28:1 (282.2 m/z), and ceramide-phosphate 28:0, respectively. (c) Asthmatics versus SHS exposed asthmatics. The significant lipid, LIPID86, is ceramide 34:2, and LIPID88 ceramide-phosphate 28:0. (d) Healthy subjects exposed to SHS versus asthmatics exposed to SHS. The significant lipids, LIPID 429 and LIPID 175, are sphingomyelin 42:3 and sphingomyelin 32:1, respectively (Healthy subjects n = 9 (no SHS n=4, +SHS n = 5); Asthmatic subjects n =11 (no SHS n=6, +SHS n = 5)).



Supplementary Table 2 – List of 91 lipids and their bivariate analysis after filtering out study groups with missing values.

| Annotation       | A (N=6)   |          | AS (N=5) |          | H (N=4)  |           | HS (N=5) |           | Wilcoxon Rank Test |        |         | T-test  |        |         |
|------------------|-----------|----------|----------|----------|----------|-----------|----------|-----------|--------------------|--------|---------|---------|--------|---------|
|                  | Mean      | Median   | Mean     | Median   | Mean     | Median    | Mean     | Median    | A vs AS            | A vs H | H vs HS | A vs AS | A vs H | H vs HS |
| SM 34:1-2 (SM)   | 0.328067  | -0.62024 | 0.08551  | -0.1695  | 0.009385 | -0.2237   | -0.4867  | -0.62302  | 0.046              | 0.327  | 0.415   | 0.204   | 0.359  | 0.132   |
| SM 34:0-2 (SM)   | 0.199614  | -0.52572 | 0.166211 | -0.57729 | 0.010043 | -0.49582  | -0.41378 | -0.5405   | 0.42               | 0.465  | 0.237   | 0.151   | 0.483  | 0.205   |
| PC 30:0 (PC 104) | 0.130729  | -0.4815  | 0.193291 | -0.41277 | -0.03944 | -0.33733  | -0.31861 | -0.35339  | 0.341              | 0.429  | 0.458   | 0.452   | 0.468  | 0.295   |
| PC 30:0 (LPC)    | 0.239603  | -0.47404 | 0.172282 | -0.53568 | -0.08026 | -0.46012  | -0.3956  | -0.56524  | 0.213              | 0.465  | 0.459   | 0.208   | 0.467  | 0.223   |
| PC 30:0 (PC)     | 0.205491  | -0.52591 | 0.165802 | -0.58867 | -0.02696 | -0.49692  | -0.38728 | -0.59127  | 0.213              | 0.465  | 0.303   | 0.208   | 0.471  | 0.236   |
| SM 32:1-4 (SM)   | 0.066023  | -0.48047 | 0.733365 | -0.23065 | -0.44951 | -0.5588   | -0.38099 | -0.48047  | 0.086              | 0.096  | 0.05    | 0.448   | 0.186  | 0.186   |
| SM 34:1-3 (SM)   | -0.006639 | -0.57357 | 0.394135 | -0.54292 | 0.051572 | -0.41876  | -0.42773 | -0.55456  | 0.343              | 0.213  | 0.301   | 0.075   | 0.303  | 0.174   |
| PC O-32:0 (LPC)  | -0.01842  | -0.55392 | 0.49132  | -0.54714 | -0.02947 | -0.42859  | -0.44564 | -0.48321  | 0.5                | 0.213  | 0.301   | 0.453   | 0.261  | 0.161   |
| PC O-32:0 (PC)   | -0.04991  | -0.56569 | 0.503803 | -0.5428  | -0.06804 | -0.46602  | -0.38948 | -0.55483  | 0.198              | 0.213  | 0.301   | 0.151   | 0.489  | 0.237   |
| PC 32:2 (LPC)    | 0.048595  | -0.48451 | -0.07785 | -0.44018 | 0.541021 | -0.27597  | -0.41328 | -0.56082  | 0.198              | 0.39   | 0.133   | 0.072   | 0.294  | 0.131   |
| PC 32:2 (PC)     | 0.104235  | -0.49012 | -0.08804 | -0.42789 | 0.479676 | -0.31669  | -0.54783 | -0.42036  | 0.198              | 0.39   | 0.133   | 0.072   | 0.377  | 0.129   |
| SM 36:1-2 (SM)   | 0.058751  | -0.5535  | 0.253687 | -0.61625 | 0.070411 | -0.44239  | -0.38052 | -0.58693  | 0.273              | 0.395  | 0.378   | 0.151   | 0.396  | 0.231   |
| PC 32:1 (PC 104) | 0.179646  | -0.39343 | 0.004398 | -0.32303 | 0.309763 | -0.32218  | -0.46778 | -0.71241  | 0.062              | 0.329  | 0.339   | 0.072   | 0.399  | 0.135   |
| PC 32:1 (LPC)    | 0.182795  | -0.52196 | 0.007559 | -0.53894 | 0.241813 | -0.38985  | -0.42036 | -0.56927  | 0.213              | 0.465  | 0.237   | 0.075   | 0.403  | 0.16    |
| PC 32:1 (PC)     | 0.168765  | -0.50335 | 0.03212  | -0.56706 | 0.196362 | -0.43476  | -0.39173 | -0.60688  | 0.162              | 0.5    | 0.303   | 0.075   | 0.424  | 0.19    |
| SM 36:0-2 (SM)   | 0.136552  | -0.44011 | 0.167535 | -0.6498  | 0.077198 | -0.38203  | -0.39316 | -0.59264  | 0.42               | 0.5    | 0.459   | 0.107   | 0.484  | 0.211   |
| PC 32:0 (PC 104) | 0.203123  | -0.50813 | 0.071084 | -0.55421 | 0.07285  | -0.42544  | -0.37311 | -0.5225   | 0.5                | 0.465  | 0.303   | 0.075   | 0.444  | 0.204   |
| PC 32:0 (LPC)    | 0.144765  | -0.49553 | 0.23496  | -0.59838 | 0.016965 | -0.46349  | -0.42225 | -0.60805  | 0.273              | 0.465  | 0.378   | 0.151   | 0.436  | 0.207   |
| PC 32:0 (PC)     | 0.112204  | -0.44366 | 0.239053 | -0.65291 | 0.039017 | -0.42797  | -0.40491 | -0.63818  | 0.273              | 0.465  | 0.378   | 0.107   | 0.462  | 0.215   |
| SM 34:1-4 (SM)   | 0.119147  | -0.54443 | 0.444805 | -0.5336  | -0.22325 | -0.52433  | -0.40918 | -0.55627  | 0.338              | 0.463  | 0.5     | 0.451   | 0.345  | 0.293   |
| SM 36:2-3 (SM)   | 0.100972  | -0.52238 | 0.327811 | -0.49884 | -0.09289 | -0.4885   | -0.37466 | -0.49331  | 0.341              | 0.358  | 0.5     | 0.451   | 0.109  | 0.265   |
| PC O-34:1 (LPC)  | 0.073018  | -0.61687 | 0.230173 | -0.53813 | 0.029717 | -0.3886   | -0.34157 | -0.59145  | 0.162              | 0.267  | 0.301   | 0.279   | 0.418  | 0.265   |
| PC O-34:1 (PC)   | 0.08819   | -0.63942 | 0.19898  | -0.57737 | -0.00336 | -0.46619  | -0.30212 | -0.58708  | 0.213              | 0.327  | 0.178   | 0.151   | 0.442  | 0.304   |
| SM 36:1-3 (SM)   | -0.06249  | -0.58553 | 0.573768 | -0.47104 | -0.11435 | -0.48148  | -0.4073  | -0.58594  | 0.162              | 0.129  | 0.301   | 0.151   | 0.465  | 0.245   |
| PC 34:2 (LPC)    | -0.24695  | -0.87154 | 0.174447 | -0.64699 | -0.02253 | -0.32544  | -0.38042 | -0.477154 | 0.232              | 0.104  | 0.023   | 0.04    | 0.202  | 0.006   |
| PC O-34:0 (LPC)  | -0.13449  | -0.5329  | 0.655011 | -0.41714 | -0.07827 | -0.42038  | -0.431   | -0.48221  | 0.273              | 0.129  | 0.415   | 0.406   | 0.158  | 0.191   |
| SM 38:3-2 (SM)   | 0.300181  | -0.45796 | -0.11881 | -0.44217 | 0.138948 | -0.36181  | -0.35257 | -0.4346   | 0.341              | 0.358  | 0.335   | 0.204   | 0.433  | 0.177   |
| PC 34:3 (LPC)    | 0.217167  | -0.51735 | -0.0427  | -0.46471 | 0.197706 | -0.38203  | -0.37606 | -0.4809   | 0.273              | 0.215  | 0.237   | 0.107   | 0.492  | 0.169   |
| PC 34:3 (PC)     | 0.191151  | -0.46298 | -0.17101 | -0.45815 | 0.406196 | -0.36141  | -0.38332 | -0.48526  | 0.162              | 0.464  | 0.181   | 0.075   | 0.29   | 0.145   |
| SM 38:2-2 (SM)   | 0.249917  | -0.4908  | -0.0188  | -0.53867 | 0.149014 | -0.44091  | -0.40031 | -0.55274  | 0.213              | 0.465  | 0.303   | 0.075   | 0.359  | 0.182   |
| PC 34:2 (PC 104) | 0.232438  | -0.48464 | 0.02925  | -0.45786 | -0.07021 | -0.41976  | -0.25201 | -0.45786  | 0.377              | 0.266  | 0.459   | 0.453   | 0.401  | 0.352   |
| PC 34:2 (LPC)    | 0.30286   | -0.45456 | -0.00251 | -0.47557 | 0.051883 | -0.42306  | -0.40243 | -0.56923  | 0.089              | 0.395  | 0.378   | 0.075   | 0.348  | 0.19    |
| PC 34:2 (PC)     | 0.208464  | -0.50574 | 0.03381  | -0.52972 | 0.140465 | -0.43847  | -0.39634 | -0.5959   | 0.089              | 0.465  | 0.303   | 0.075   | 0.407  | 0.193   |
| SM 38:1-2 (SM)   | 0.23527   | -0.53413 | 0.138705 | -0.546   | -0.00438 | -0.46636  | -0.40343 | -0.60179  | 0.162              | 0.5    | 0.303   | 0.107   | 0.456  | 0.226   |
| PC 34:0 (LPC)    | 0.135548  | -0.61791 | -0.30945 | -0.61791 | 0.482962 | -0.09319  | -0.23958 | -0.61791  | 0.454              | 0.459  | 0.363   | 0.349   | 0.429  | 0.187   |
| PC 34:0 (PC)     | 0.20471   | -0.50275 | 0.027668 | -0.48943 | 0.231552 | -0.43998  | -0.45856 | -0.59024  | 0.162              | 0.5    | 0.378   | 0.075   | 0.339  | 0.16    |
| PC 34:0 (PC)     | 0.188208  | -0.54708 | 0.099959 | -0.59774 | 0.133556 | -0.48977  | -0.43265 | -0.60129  | 0.42               | 0.329  | 0.303   | 0.208   | 0.451  | 0.189   |
| SM 36:1-4 (SM)   | 0.042366  | -0.50798 | 0.492191 | -0.17891 | -0.36275 | -0.45978  | -0.25283 | -0.47507  | 0.12               | 0.096  | 0.454   | 0.451   | 0.296  | 0.324   |
| SM 40:4-2 (SM)   | 0.180681  | -0.49851 | -0.03742 | -0.4647  | 0.19113  | -0.47001  | -0.3323  | -0.56969  | 0.213              | 0.329  | 0.303   | 0.075   | 0.495  | 0.228   |
| PC 36:4 (LPC)    | 0.24782   | -0.43459 | -0.09886 | -0.49863 | 0.187069 | -0.47109  | -0.34818 | -0.44331  | 0.42               | 0.5    | 0.5     | 0.453   | 0.225  | 0.208   |
| PC 36:4 (PC)     | 0.190162  | -0.48028 | -0.03927 | -0.48001 | 0.231876 | -0.47727  | -0.37442 | -0.55102  | 0.121              | 0.464  | 0.378   | 0.075   | 0.369  | 0.198   |
| SM 40:3-2 (SM)   | 0.331671  | -0.45494 | -0.228   | -0.44351 | 0.156656 | -0.42237  | -0.29533 | -0.48816  | 0.162              | 0.5    | 0.181   | 0.075   | 0.428  | 0.222   |
| PC 36:3 (LPC)    | 0.30875   | -0.44749 | -0.15573 | -0.32579 | 0.10427  | -0.37609  | -0.29818 | -0.50951  | 0.162              | 0.465  | 0.237   | 0.075   | 0.332  | 0.23    |
| PC 36:3 (PC)     | 0.266816  | -0.49608 | -0.15284 | -0.50408 | 0.203778 | -0.43873  | -0.33037 | -0.51835  | 0.213              | 0.465  | 0.181   | 0.107   | 0.296  | 0.21    |
| SM 40:2-2 (SM)   | 0.404392  | -0.49908 | -0.14972 | -0.44051 | 0.015657 | -0.41906  | -0.34807 | -0.55158  | 0.121              | 0.465  | 0.237   | 0.075   | 0.263  | 0.229   |
| PC 36:2 (LPC)    | 0.24371   | -0.46757 | -0.01178 | -0.48338 | 0.19063  | -0.42969  | -0.43318 | -0.66469  | 0.162              | 0.395  | 0.303   | 0.107   | 0.476  | 0.175   |
| PC 36:2 (PC)     | 0.309857  | -0.54925 | -0.07334 | -0.51926 | 0.07119  | -0.41841  | -0.35544 | -0.56511  | 0.343              | 0.5    | 0.237   | 0.107   | 0.248  | 0.225   |
| SM 40:1-2 (SM)   | 0.386545  | -0.51973 | 0.106745 | -0.07271 | -0.15358 | -0.2583   | -0.44773 | -0.60927  | 0.121              | 0.464  | 0.378   | 0.107   | 0.368  | 0.144   |
| PC 36:1 (LPC)    | -0.01789  | -0.61451 | 0.353824 | -0.05144 | 0.128764 | -0.3715   | -0.43536 | -0.65073  | 0.089              | 0.213  | 0.178   | 0.208   | 0.097  | 0.198   |
| PC 36:1 (PC)     | 0.202126  | -0.62175 | 0.254327 | -0.26099 | -0.05049 | -0.56688  | -0.45648 | -0.63248  | 0.089              | 0.327  | 0.458   | 0.107   | 0.098  | 0.228   |
| SM 40:0-2 (SM)   | 0.171018  | -0.58708 | 0.106551 | -0.16807 | -0.14216 | -0.27173  | -0.19805 | -0.17701  | 0.343              | 0.096  | 0.223   | 0.5     | 0.472  | 0.416   |
| PC 38:6 (LPC)    | 0.448125  | -0.31542 | -0.20231 | -0.30513 | 2.01E-05 | -0.46003  | -0.33546 | -0.56941  | 0.26               | 0.39   | 0.456   | 0.349   | 0.199  | 0.262   |
| PC 38:6 (PC)     | 0.272592  | -0.53369 | -0.0753  | -0.47232 | 0.057985 | -0.46627  | -0.2982  | -0.52749  | 0.338              | 0.5    | 0.5     | 0.451   | 0.328  | 0.279   |
| PC 38:5 (PC)     | 0.297315  | -0.54107 | -0.10666 | -0.5214  | 0.100962 | -0.3604   | -0.33089 | -0.49461  | 0.419              | 0.428  | 0.335   | 0.279   | 0.412  | 0.222   |
| SM 42:4-2 (SM)   | 0.148933  | -0.64775 | 0.140883 | -0.23327 | 0.03603  | -0.38884  | -0.34843 | -0.66148  | 0.213              | 0.213  | 0.335   | 0.275   | 0.496  | 0.265   |
| PC 38:4 (LPC)    | 0.407601  | -0.53459 | -0.11443 | -0.65549 | 0.071601 | -0.18548  | -0.43197 | -0.66133  | 0.26               | 0.463  | 0.301   | 0.072   | 0.223  | 0.125   |
| PC 38:4 (PC)     | 0.368003  | -0.56861 | -0.08074 | -0.54517 | 0.063138 | -0.31595  | -0.41138 | -0.62288  | 0.159              | 0.5    | 0.301   | 0.074   | 0.2    | 0.164   |
| SM 42:3-2 (SM)   | 0.206618  | -0.6028  | 0.324667 | 0.345392 | -0.00035 | -0.00957  | -0.57233 | -0.72268  | 0.086              | 0.358  | 0.415   | 0.204   | 0.061  | 0.07    |
| PC 38:3 (LPC)    | 0.259755  | -0.58545 | 0.104726 | -0.18482 | -0.06346 | 0.063265  | -0.36566 | -0.5314   | 0.338              | 0.463  | 0.415   | 0.275   | 0.192  | 0.204   |
| PC 38:3 (PC)     | 0.262701  | -0.65654 | 0.067249 | -0.30698 | 0.095973 | -0.210708 | -0.45927 | -0.62224  | 0.38               | 0.428  | 0.415   | 0.177   | 0.163  | 0.08    |
